# Supplementary material for: Diagnostic performance of circulating tumor DNA as a minimally invasive biomarker for hepatocellular carcinoma: a systematic review and meta-analysis
Source: PeerJ. 2022 Nov 3;10:e14303. doi: 10.7717/peerj.14303 (PMC9637356; doi:10.7717/peerj.14303)
Supplement: Supplemental Information 2 [file peerj-10-14303-s002.xlsx]

## Sheet: Sheet1
First author	Year	Country/ Region	Study type	Control type	HCC/BD/ HC	Timing sample	Sample source	Detection methods	Assay indicators	Cutoff value	SEN (%)	SPE (%)	PLR	NLR	TP	FP	FN	TN
Wong et al.	2000	Hong Kong	Prospective	LC/HC	25/35/20	Pre surgery	Plasma and Serum	MSP	Methylation(P15)	NA	16	100	Infinity	0.84	4	0	21	55
									Methylation (P16)	NA	60	100	Infinity	0.4	15	0	10	55
Huang et al.	2003	China	NA	LC/HC	45/30/20	NA	Plasma	PCR	Mut（249Ser p53）	NA	40	88	3.33333	0.681818	10	6	15	44
Wong et al.	2003	Hong Kong	Prospective	LC/HC	45/30/20	Pre surgery	Plasma	RTQ-MSP	Methylation （p16INK4a）	NA	31.1111	100	Infinity	0.688889	14	0	31	50
Chu et al.	2004	Korea	NA	LC	46/23/-	NA	Serum	MSP	Methylation （p16INK4A）	NA	47.8261	82.6087	2.75	0.631579	22	4	24	19
Yeo et al.	2005	Hong Kong	NA	HC	40/-/10	NA	Plasma	MSP	Methylation （RASSF1A）	NA	42.5	100	Infinity	0.575	17	0	23	10
Lin et al.	2005	Nanjing	NA	BD/HC	64/15/20	Next day of hospital	Serum	MSP	Methylation （p16)	NA	76.5625	100	Infinity	0.234375	49	0	15	35
									Methylation (DAPK)		40.625	100	Infinity	0.59375	26	0	38	35
Wang et al.	2006	China	NA	LC/HC	32/8/-	NA	Serum	MSP	Methylation(GSTP1)	NA	50	62.5	1.33333	0.8	16	3	16	5
Zhang et al.	2007	Taiwan	Prospective	HC	50/-/50	Before diagnosis	Serum	MSP	Methylation(P15)	NA	24	100	Infinity	0.76	12	0	38	50
									Methylation(P16)	NA	44	96	11	0.583333	22	2	28	48
									Methylation(RASSF1A)	NA	70	94	11.6667	0.319149	35	3	15	47
Chang et al.	2008	China	NA	LC	26/16/-	NA	Plasma	MSP	Methylation(P16)	NA	19.2308	100	Infinity	0.807692	5	0	21	16
									Methylation(GSTP1)	NA	19.2308	93.75	3.07692	0.861538	5	1	21	15
									Methylation（APC）	NA	61.5385	87.5	4.92308	0.43956	16	2	10	14
									Methylation(RASSF1A)	NA	26.9231	81.25	1.4359	0.899408	7	3	19	13
									Methylation(CDH1)	NA	26.9231	75	1.07692	0.974359	7	4	19	12
Igetei et al.	2008	Nigeria	Case-control	HC	79/-/73	NA	Plasma	RFLP	Mut（249Ser p53)	NA	7.59494	100	Infinity	0.924051	6	0	73	73
Ahmed et al.	2010	Egypt	NA	LC/CAH	25/37/-	NA	Serum	MSP	Methylation(p16INK4a)	NA	92	67.5676	2.83667	0.1184	23	12	2	25
Hu et al.	2010	China	Retrospective	HC	35/-/10	Prospective	Serum	MSP	Methylation（RASSF1A）	NA	40	100	Infinity	0.6	14	0	21	10
Huang et al.	2011	China	NA	BD/HC	72/37/-	Before treatment	Plasma	MSRE-qPCR	Methylation（APC）	NA	84.7222	72.973	3.13472	0.209362	61	10	11	27
									Methylation（GSTP1）	NA	62.5	83.7838	3.85417	0.447581	45	6	27	31
									Methylation（RASSF1A）	NA	63.8889	94.5946	11.8194	0.381746	46	2	26	35
									Methylation（SFRP1）	NA	40.2778	83.7838	2.4838	0.712814	29	6	43	31
Sun et al.	2013	China	Case-Control	CHB/HC	43/24/26	NA	Serum	MSP	Methylation（TFPI2）	NA	46.5116	82	2.58398	0.652297	20	9	23	41
Zhang et al.	2013	China	Retrospective	HC	31/-/27	Pre treatment	Serum	Pyrosequencing	Methylation (DBX2)	NA	90.3226	88.8889	8.12903	0.108871	28	3	3	24
									Methylation (THY1)		83.871	81.4815	4.52903	0.197947	26	5	5	22
Han et al.	2014	China	NA	CHB/HC	160/88/45	NA	Serum	MSP	Methylation （TGR5）		48.125	89.4737	4.57187	0.579779	77	14	83	119
									TGR5 and AFP	400ng/mL	65	85.2273	4.4	0.410667	104	13	56	75
Huang et al.	2014	America	Retrospective	CLD/-	66/43/-	NA	Serum	PCR and pyrosequencing	Methylation （INK4A）	5% (LOD)	65.1515	86.0465	4.66919	0.404996	43	6	23	37
									Methylation （INK4A and AFP）		80.303	100	Infinity	0.19697	53	0	13	43
Ji et al.	2014	China	Retrospective	CHB/HC	121/37/-	Before therapy	Serum	MSP	Methylation（MT1M）	NA	50	62.1622	1.32143	0.804348	50	14	50	23
									Methylation（MT1G）	NA	69	83.7838	4.255	0.37	69	6	31	31
Kuo et al.	2014	Taiwan	NA	HC	39/-/34	During surgery	Plasma	Q-MSP	Methylation（HOXA9）	MI > 0.88	74.359	97.0588	25.2821	0.26418	29	1	10	33
									HOXA9 or AFP		94.8718	97.0588	32.2564	0.0528361	37	1	2	33
Li et al.	2014	China	Case-Control	CHB/HC	136/46/35	NA	Serum	MSP	Methylation（IGFBP7）	NA	65.4412	83.9506	4.07749	0.411657	89	13	47	68
									IGFBP7and AFP	>= 20 ng/ml	85.2941	41.3043	1.45316	0.356037	116	27	20	19
Yang et al.	2014	China	Case-Control	LC/CHB/HC	123/57/20	NA	Serum	MSP	Methylation（CDO1）	NA	42.2764	92.2078	5.42547	0.626016	52	6	71	71
									Methylation（CDO1） and AFP	20 ng / ml	82.9268	75.4386	3.37631	0.226319	102	14	21	43
Dong et al.	2015	China	NA	LC/CHB/HC	190/234/160	Before treatment	Serum	MSP	Methylation（RASSF1）	NA	64.2105	93.401	9.73036	0.383181	122	26	68	368
									Methylation（RASSF1） and AFP	20 ng / ml	80.8333	93.3333	12.125	0.205357	97	8	23	112
Huang et al.	2015	China	NA	HCC/LC	31/10/-	NA	Plasma	MSP	Methylation（ELF）	NA	58.0645	80	2.90323	0.524194	18	2	13	8
									Methylation（RASSF1A）	NA	51.6129	80	2.58065	0.604839	16	2	15	8
									Methylation（P16）	NA	41.9355	70	1.39785	0.829493	13	3	18	7
									Methylation（GSTP1）	NA	38.7097	60	0.967742	1.02151	12	4	19	6
Ramadan et al.	2015	Egypt	Case-Control	LC/HC	30/50/50	NA	Serum	MSP	Methylation（SPINT2/HAI-2）	NA	66.6667	48	1.28205	0.694444	20	52	10	48
Teng et al.	2016	China	Retrospective study	CHB/HC	111/66/-		Serum	MSP	Methylation（SOX11）	NA	69.3694	86.3636	5.08709	0.35467	77	9	34	57
									SOX11 and AFP	20 ng/ml	85.5856	59.0909	2.09209	0.243936	95	27	16	39
Dong et al.	2017	China	Case-Control	LC/CHB/HC	98/165/80	NA	Serum	MSP	Methylation(RASSF1A)	PMR≥4%	52.0408	93.0612	7.5	0.515351	51	17	47	228
									Methylation(APC)		36.7347	97.551	15	0.648536	36	6	62	239
									Methylation(BVES)		29.5918	98.3673	18.125	0.715768	29	4	69	241
									Methylation(GSTP1)		17.3469	99.1837	21.25	0.833333	17	2	81	243
									Methylation(HOXA9)		20.4082	98.3673	12.5	0.809129	20	4	78	241
Hu et al.	2017	China	NA	LC/CHB/HC	80/80/20	Prior to treatment	Serum	MSP	Methylation(UBE2Q1)		66.25	59	1.61585	0.572034	53	41	27	59
									UBE2Q1 and AFP	200ng/ml	53.75	87.5	4.3	0.528571	43	10	37	70
Tian et al.	2017	China	Case-Control	CHB/HC	120/146/27	NA	Serum	MSP	Methylation( HCCS1)	NA	62.5	84.3931	4.00463	0.444349	75	27	45	146
									Methylation(HCCS1) and AFP	20 ng/ml	81.6667	52.0548	1.70333	0.352193	98	70	22	76
Wu et al.	2017	Taiwan	Case-Control	BD	237/257/-	Before diagosis	Plasma	Pyrosequencing assay	Methylation(CDKN2A)		21.2766	79.2969	1.0277	0.992768	50	53	185	203
									Methylation(VIM)		13.1356	90.1961	1.33983	0.963062	31	25	205	230
									Methylation(ZNF154)		60.2679	43.1907	1.06088	0.919924	135	146	89	111
									Methylation(RASSF1A)		8.86076	93.75	1.41772	0.972152	21	16	216	240
									Methylation(TBX2)		75.5274	41.2451	1.28547	0.593344	179	151	58	106
Li et al.	2018	China	NA	CHB/HC	155/60/20	The first day of diagnosis	Serum	MSP	Methylation(IGFBP7)	NA	67.7419	78.75	3.18786	0.409626	105	17	50	63
Oussalah(a) et al.	2018	French	Observational study	LC	51/135/-	Before diagosis	Plasma	real-time PCR	Methylation(mSEPT9)	≥2 positive triplicates	94.1176	84.4444	6.05042	0.0696594	48	21	3	114
Oussalah(b) et al.		Germany	Case-control	LC	47/56/-	before diagosis	Plasma	real-time PCR	Methylation(mSEPT9)	≥2 positive triplicates	85.1064	91.0714	9.53191	0.163538	40	5	7	51
Wei et al.	2018	China	Case-Control	LC/BD/HC	119/157/50	Before surgery	Plasma	MSP	Methylation(SOCS3)	NA	28.5714	93.6306	4.48571	0.762877	34	10	85	147
Bai et al.	2019	China	Case-control	NC	56/-/24	NA	Serum	MSP	Methylation(FHIT)	NA	51.7857	83.3333	3.10714	0.578571	29	4	27	20
									Methylation(P16)		67.8571	75	2.71429	0.428571	38	6	18	18
Kisiel et al.	2019	American	Case-control	LC	21/30/-	Before treatment	Plasma	MSP	Methylation(EMX1)	NA	76.1905	100	Infinity	0.238095	16	0	5	30
Marchio et al.	2019	Tunis	Retrospective	HC	47/-/51		Serum	ddPCR	Mut(TERT)	NA	14.8936	94.1176	2.53191	0.904255	7	3	40	48
									Mut(p53 R249S)	NA	19.1489	47.0588	0.361702	1.71809	9	27	38	24
Pasha et al.	2019	Egypt	Case-control	LC/HC	100/100/100	NA	Serum	MSP	Methylation(RASSF1A)		40	93	5.71429	0.645161	40	14	60	186
									Methylation(SOCS1)		38	78.5	1.76744	0.789809	38	43	62	157
									RASSF1A and AFP		73	79	3.47619	0.341772	73	21	27	79
									SOCS1 and AFP		75	78	3.40909	0.320513	75	22	25	78
									SEPT9 andAFP	20 ng/mL	74.2647	90	7.42647	0.285948	101	8	35	72
Liu et al.	2020	China	Prospective Studie	CHB/HC	105/54/32	Before treatment	Plasma	MSP	Methylation(CCND1)		76.1905	69.7674	2.52015	0.34127	80	26	25	60
									CCND1 and AFP	400ng/ml	88.5714	61.1111	2.27755	0.187013	93	21	12	33
Qian et al.	2020	China	NA	LC/CHB/HC	118/122/-	NA	Plasma	MSP	Methylation(CCND2)		44.0678	90.1639	4.48023	0.620339	52	12	66	110
									CCND2 and AFP	20ng/ml	81.3559	57.4468	1.91186	0.324545	96	20	22	27
									（Methylation）CCND2	20ng/ml	81.3559	62.6667	2.17918	0.297512	96	28	22	47
Akuta et al.	2020	Japan	Retrospective cohort study	NH	36/21/-	At the time of diagnosis	Serum	WTB-PCR	MUT-(TERT C228T)	NA	63.8889	95.2381	13.4167	0.379167	23	1	13	20
Lewin et al.	2021	American	Cross sec- tional case control	LC	60/103/-	Before treatment	Plasma	NGS	Methylation(SEPT9 )	NA	76.6667	64.0777	2.13423	0.364141	46	37	14	66
																						240
																						216
																						16
																						21
																						0.972152
																						1.41772
																						93.75
																						8.86076
																						Methylation(RASSF1A)
																						20	66
																						13	14
																						1	37
																						23	46
																						0.379167	0.364141
																						13.4167	2.13423
																						95.2381	64.0777
																						63.8889	76.6667
																						NA	NA
																						MUT-(TERT C228T)	Methylation(mSEPT9 )
																						WTB-PCR	NGS
																						Serum	Plasma
																						At the time of diagnosis	Before treatment
																						36/21/-	60/103/-
																						NH	LC
																						Retrospective cohort study	Cross sec- tional case control
																						Japan	American
																						2020	2021
																						Akuta et al.	Lewin et al.
